# Supplementary material for: A Multimodality Myocardial Perfusion Phantom: Initial Quantitative Imaging Results
Source: MDPI journal article supplement (doi:10.3390/bioengineering9090436), 2022-09-04
Supplement: s1 [file s1]

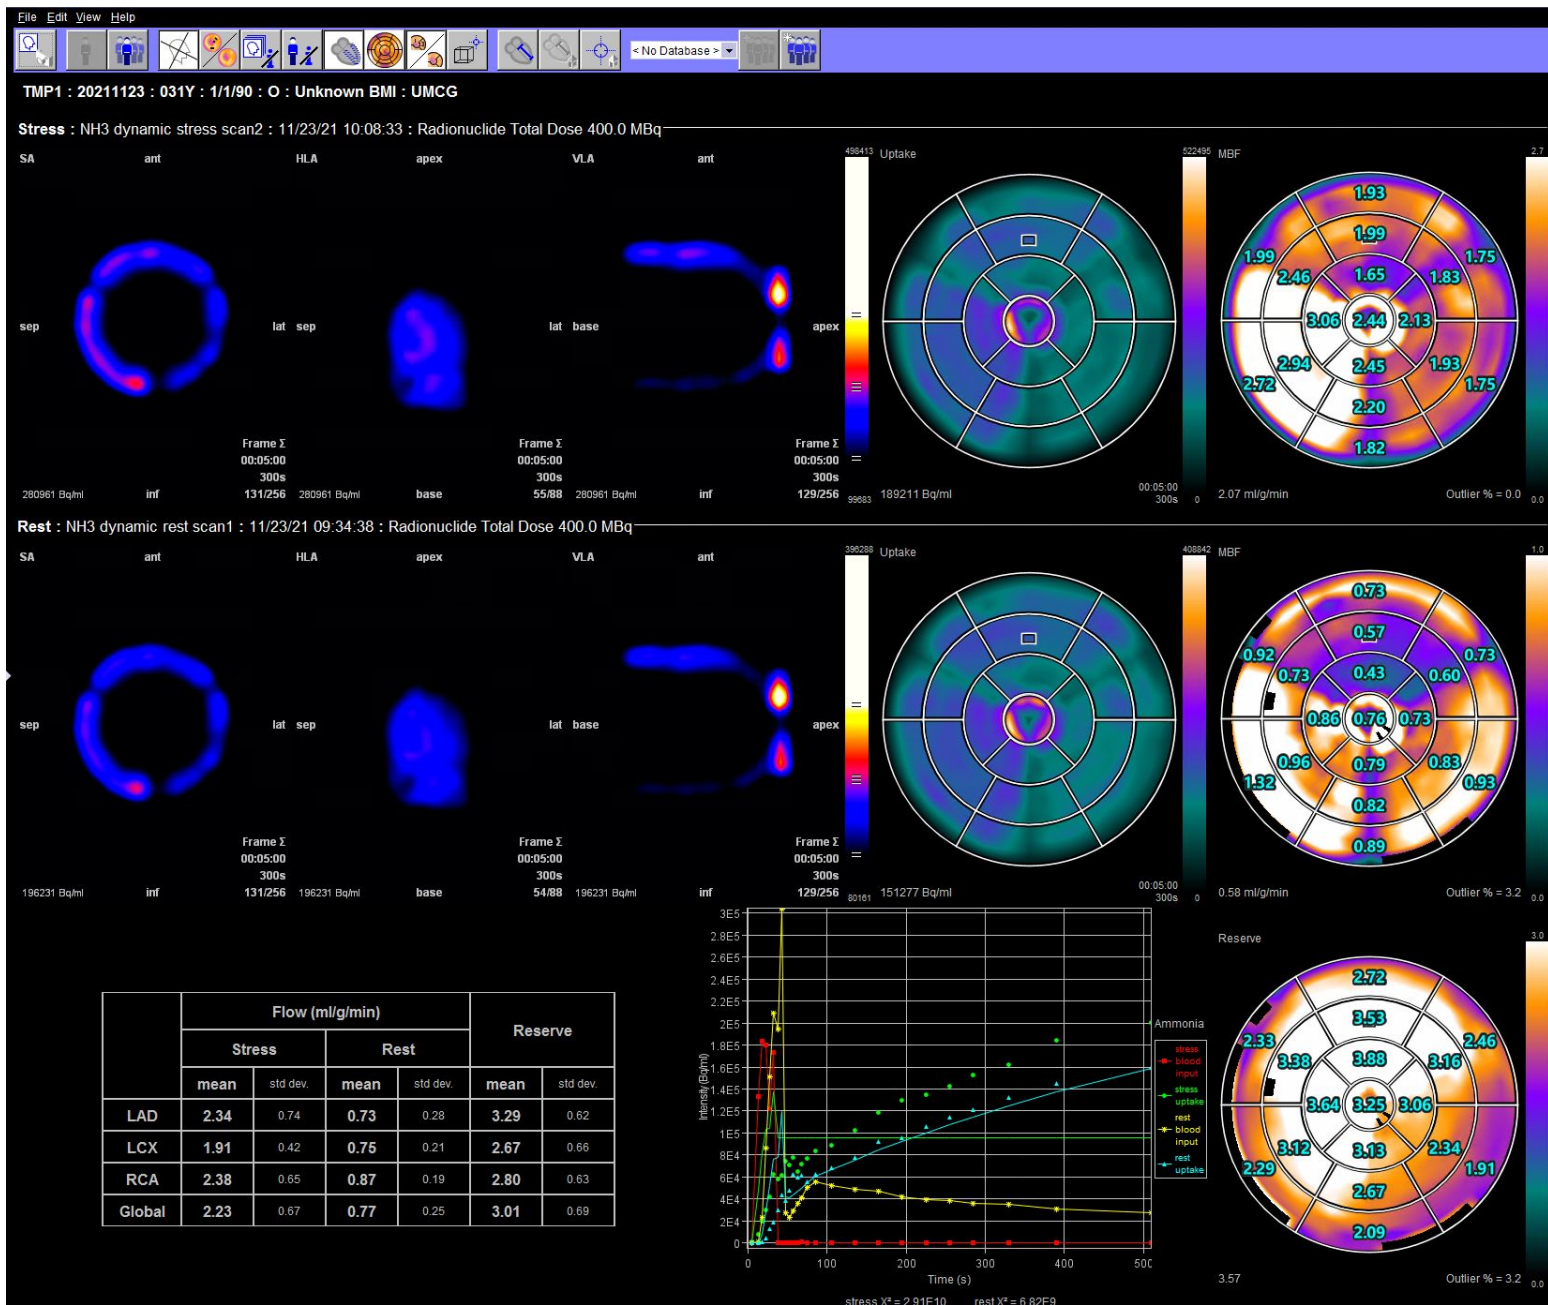

PET/CT perfusion analysis display using SyngoMBF VB14 (Siemens Healthineers, Forchheim, Germany).

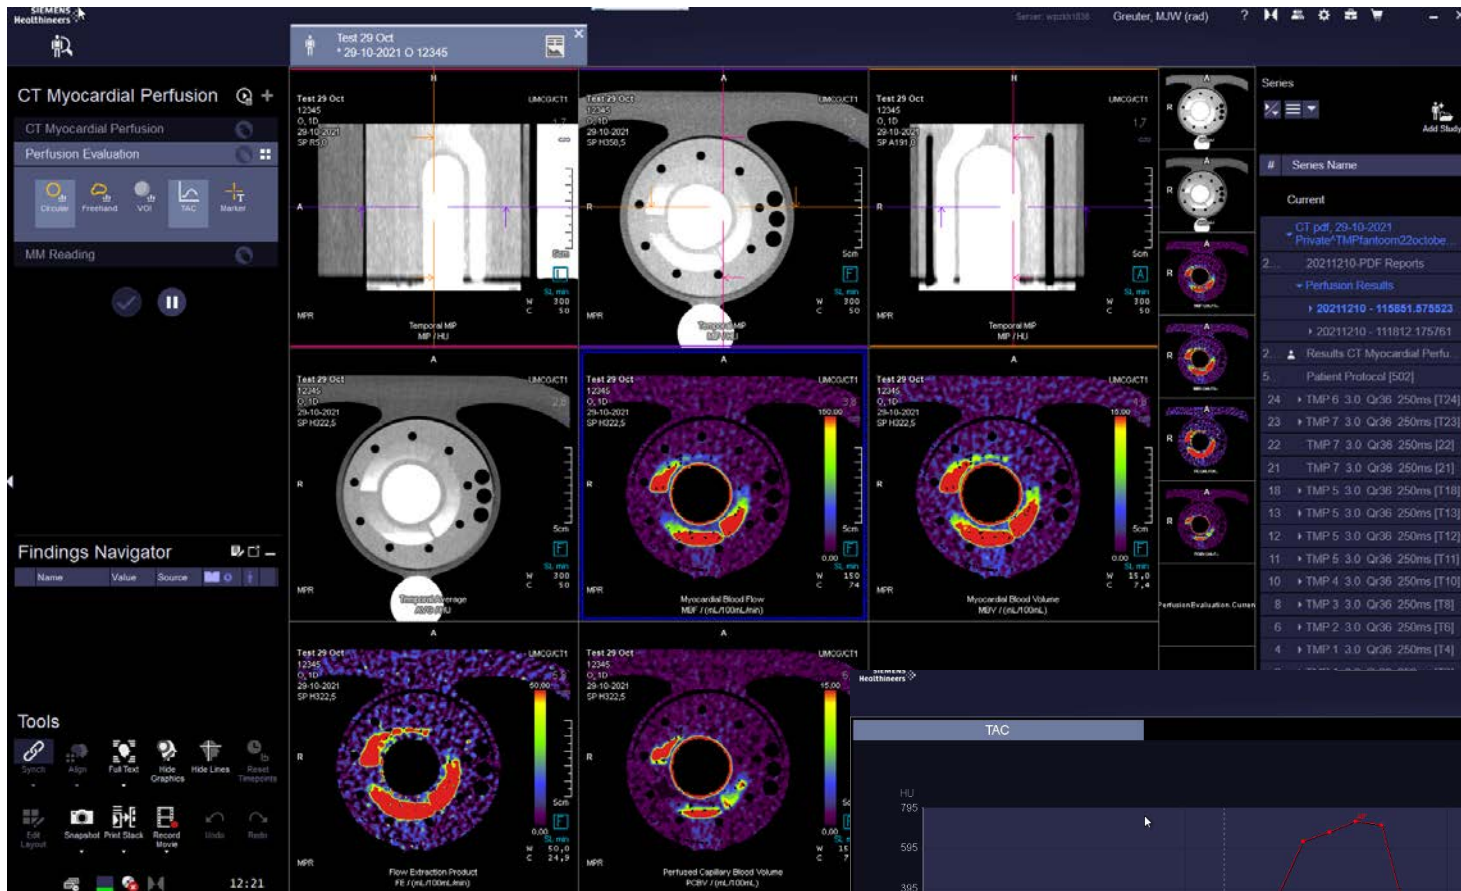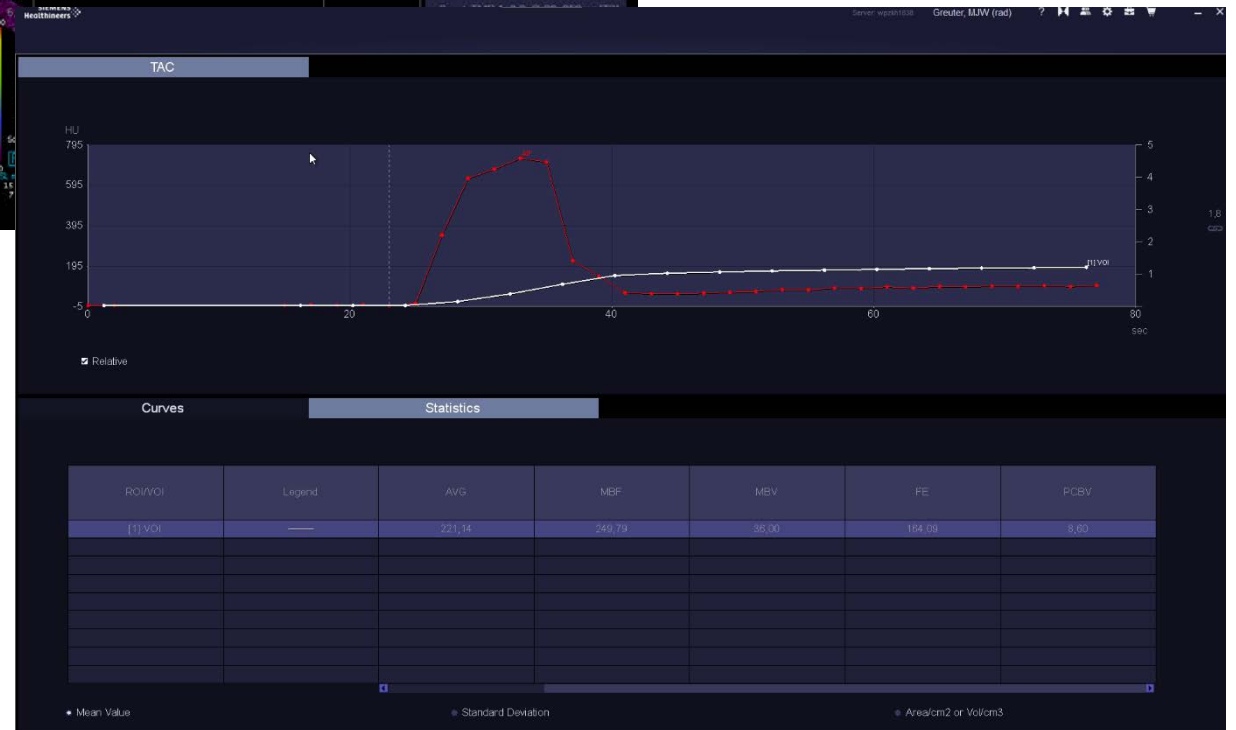

CT perfusion analysis display using Syngo.via Enterprise Browser VB40 HF20 (Siemens Healthineers, Forchheim, Germany).

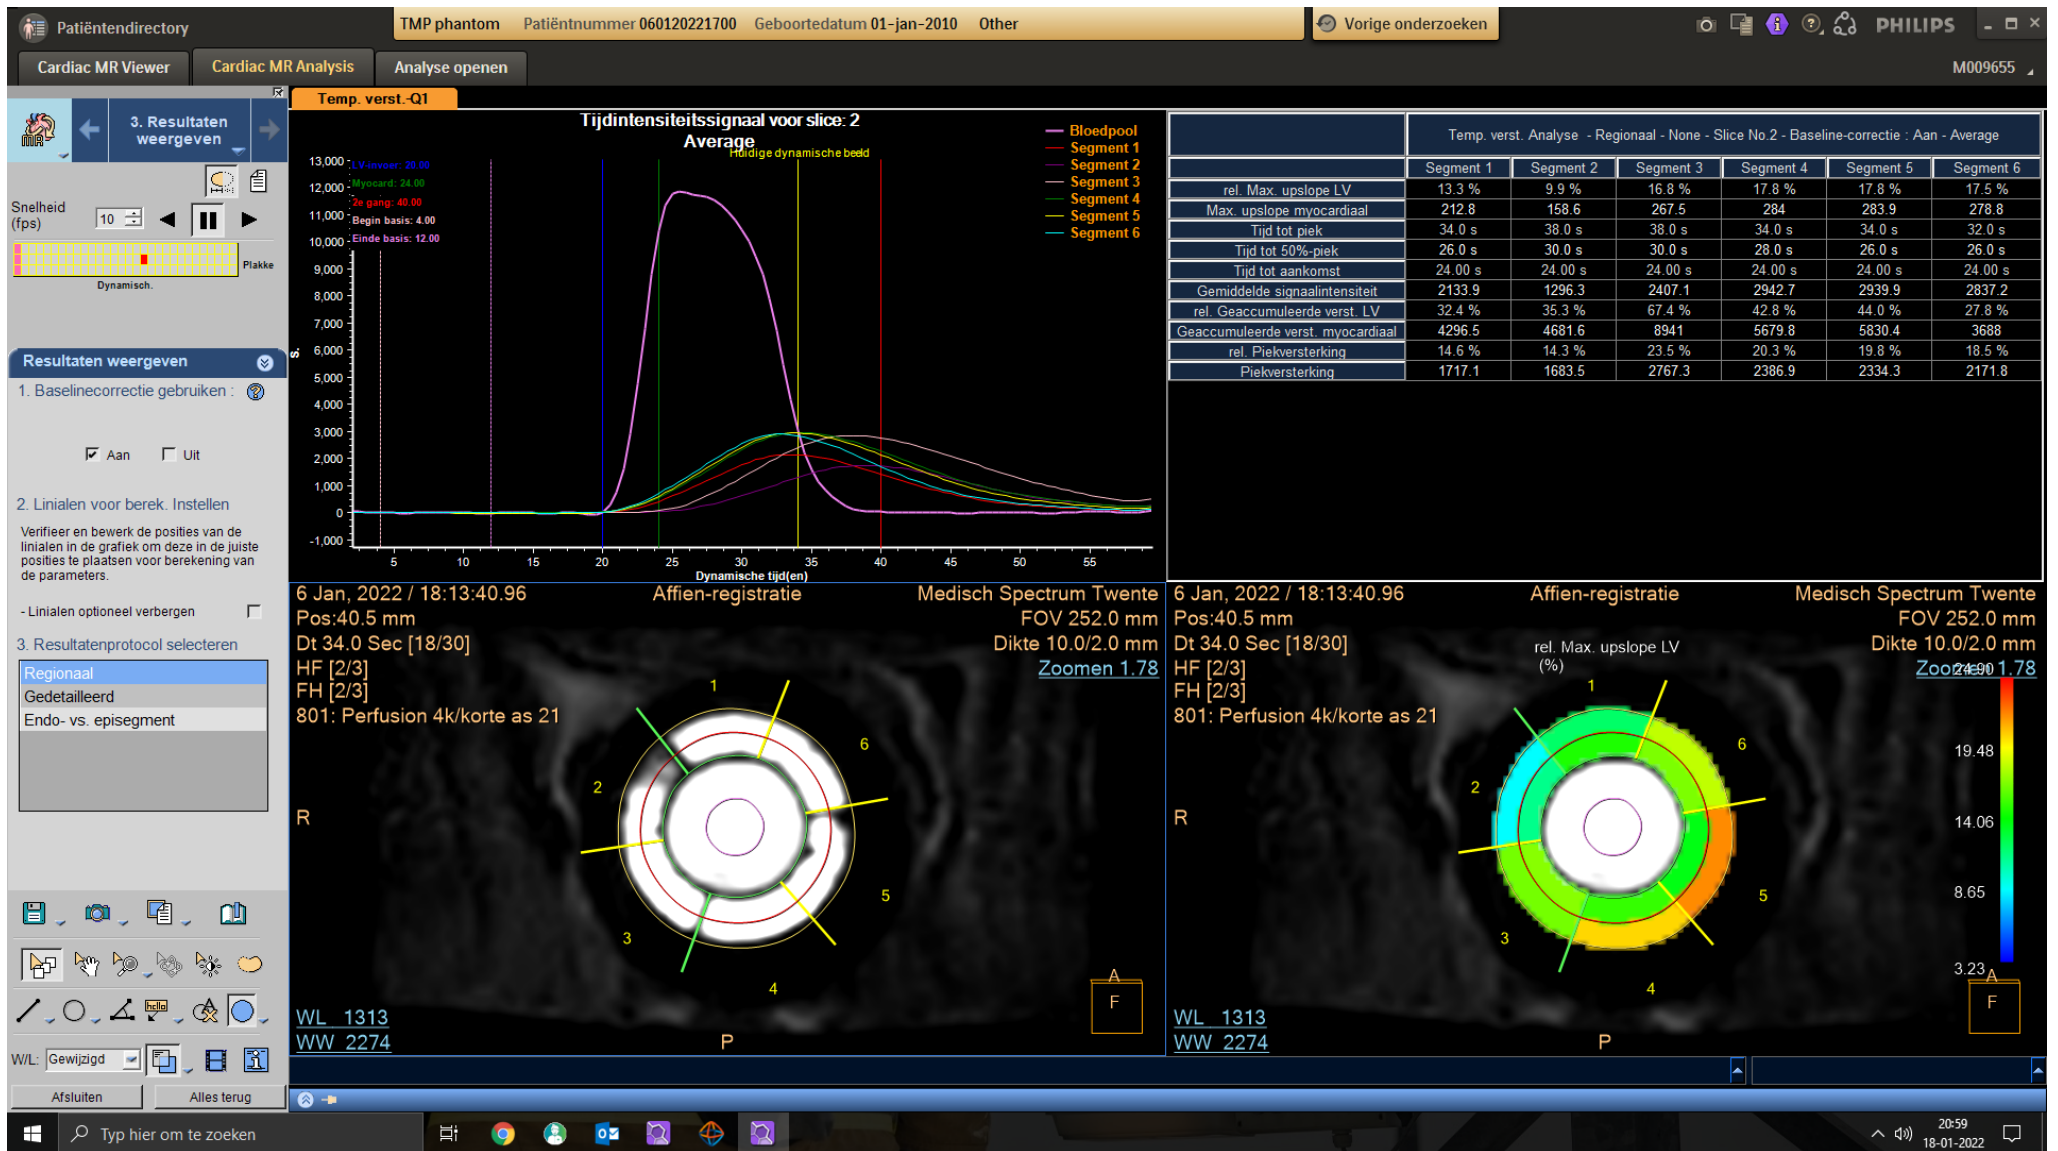

MRI perfusion analysis display using Intellispace software (Philips Healthcare, the Netherlands).
